# Supplementary material
Source: publisher figshare collection journal article supplement (https://tandf.figshare.com/ndownloader/files/23003477)
Supplement: Supplementary file 1 [file 23003477]

*Appendix A:*

*ATC codes used*

Antidiabetic:

A10 Anti-diabetics

Cardiovascular:

B0 Cardiovascular

C01-C03 Cardiovascular

C07-C09 Cardiovascular

Anti-inflammatory:

M01 Anti-inflammatory and anti-rheumatics

Analgesic:

N02 Analgesics

Antipsychotic:

N05A Antipsychotics

Benzodiazepines:

N05B Anxiolytics

N05C Hypnotics

Antidepressants:

N06A Antidepressants

Antidementia:

N06D Antidementia

Respiratory:

R03 Respiratory
